# Supplementary material for: Pneumococcal Vaccination for Children in Asian Countries: A Systematic Review of Economic Evaluation Studies
Source: MDPI journal article supplement (doi:10.3390/vaccines8030426), 2020-07-30
Supplement: s1 [file s1]

## **Supplementary Material**

### **Appendix I. Search Strategy**

#### **Search strategy**

*Vaccine term:*

("Pneumococcal Vaccines"[Mesh] OR PCV) OR (("Pneumonia"[Mesh]) AND (Vaccine\* OR Immune\*))

*Cost term:*

AND ("Costs and Cost Analysis"[Mesh] OR "Cost-Benefit Analysis"[Mesh] OR Cost Effectiveness OR Cost Utility OR Cost Minimi\* OR Economic Evaluation OR Economic Analysis)

*Countries: (Asia)*

AND ("Asia"[Mesh] OR "Asia, Central"[Mesh] OR "Kazakhstan"[Mesh] OR "Kyrgyzstan"[Mesh] OR "Tajikistan"[Mesh] OR "Turkmenistan"[Mesh] OR "Uzbekistan"[Mesh] OR "Asia, Southeastern"[Mesh] OR "Brunei"[Mesh] OR "Cambodia"[Mesh] OR "Indonesia"[Mesh] OR "Laos"[Mesh] OR "Malaysia"[Mesh] OR "Myanmar"[Mesh] OR "Philippines"[Mesh] OR "Singapore"[Mesh] OR "Thailand"[Mesh] OR "Timor-Leste"[Mesh] OR "Vietnam"[Mesh] OR "Asia, Western"[Mesh] OR "Bangladesh"[Mesh] OR "Bhutan"[Mesh] OR "India"[Mesh] OR "Nepal"[Mesh] OR "Pakistan"[Mesh] OR "Sri Lanka"[Mesh] OR "Middle East"[Mesh] OR "Afghanistan"[Mesh] OR "Bahrain"[Mesh] OR "Iran"[Mesh] OR "Iraq"[Mesh] OR "Israel"[Mesh] OR "Jordan"[Mesh] OR "Kuwait"[Mesh] OR "Lebanon"[Mesh] OR "Oman"[Mesh] OR "Qatar"[Mesh] OR "Saudi Arabia"[Mesh] OR "Syria"[Mesh] OR "Turkey"[Mesh] OR "United Arab Emirates"[Mesh] OR "Yemen"[Mesh] OR "Far East"[Mesh] OR "China"[Mesh] OR "Japan"[Mesh] OR "Korea"[Mesh] OR "Democratic People's Republic of Korea"[Mesh] OR "Republic of Korea"[Mesh] OR "Taiwan"[Mesh] OR "Asia, Northern"[Mesh] OR "Russia"[Mesh])

**PUBMED**

((Pneumococcal Vaccines\* OR PCV) AND Pneumonia AND (Vaccine\* OR Immune\*) AND (Costs and Cost Analysis OR Cost-Benefit Analysis OR Cost Effectiveness OR Cost Utility OR Cost Minimi\* OR Economic Evaluation OR Economic Analysis))

**EMBASE**

(pneumococcal AND vaccines\* OR pcv) AND ('pneumonia'/exp OR pneumonia) AND (vaccine\* OR immune\*) AND ((((((costs AND ('cost'/exp OR cost) AND ('analysis'/exp OR

analysis) OR 'cost benefit'/exp OR 'cost benefit') AND ('analysis'/exp OR analysis) OR  
'cost'/exp OR cost) AND effectiveness OR 'cost'/exp OR cost) AND utility OR 'cost'/exp OR  
cost) AND minimi\* OR economic) AND ('evaluation'/exp OR evaluation) OR economic) AND  
('analysis'/exp OR analysis)
